# Supplementary material
Source: Springer Nature journal article supplement (https://www.springermedizin.de/resource/supplementary/12936_2009_1023_MOESM4_ESM.pdf/9548800)
Supplement: MOESM4 [file 9548800]

- Weight <5 kg: artemether-lumefantrine not recommended
- Weight 5.0–14.9 kg: 1 tablet twice a day for 3 days
- Weight 15.0–24.0 kg: 2 tablets twice a day for 3 days
- Weight 24.1–34.9 kg: 3 tablets twice a day for 3 days
- Weight  $\geq$ 35.0 kg: 4 tablets twice a day for 3 days

*Notes.* Each tablet contained 20 mg of artemether and 120 mg of lumefantrine. These dosage definitions were slightly modified from those in the National Malaria Control Program (NMCP) guidelines because weight categories in the guidelines (<5 kg, 5–14 kg, 15–24 kg, 24–34 kg, and >35 kg) had gaps and were not mutually exclusive. For example, the dosage was not clear for patients weighing 14.5 kg (in between 2 weight categories) or 24.0 kg (in 2 categories). In practice, difficulty in applying the NMCP guidelines was rare (only 2 patients); in these cases, dosage was considered correct. Also, regarding routine use of the guidelines in the field, the guidelines include a dosage chart based on patient age, which health workers can use to overcome difficulties related to the weight-specific dosage chart.
